# Supplementary material for: Collective generation of milliemulsions by step-emulsification
Source: Royal Society of Chemistry journal article supplement (doi:10.1039/c7ra00935f), 2017-01-01
Supplement: c7ra00935f1.pdf [file c7ra00935f1.pdf]

Electronic Supplementary material

Journal name: RSC Advances

### **Collective Generation of Milliemulsions by Step-Emulsification**

Xing Huang,<sup>a</sup> Max Eggersdorfer,<sup>b</sup> Jinrong Wu,<sup>b</sup> Chun-Xia Zhao,<sup>c</sup> Zhongbin Xu<sup>a,b,\*</sup> Dong  
Chen,<sup>a,b,d,\*</sup> and David A. Weitz<sup>b,\*</sup>

<sup>a</sup>Institute of Process Equipment, College of Energy Engineering, Zhejiang University, Zheda  
Road No.38, Hangzhou, 310027, China

<sup>b</sup>John A. Paulson School of Engineering and Applied Sciences, Harvard University,  
Cambridge, Massachusetts, 02138, USA

<sup>c</sup>Australian Institute for Bioengineering and Nanotechnology, The University of Queensland, St  
Lucia, QLD, Australia 4072

<sup>d</sup>State Key Laboratory of Fluid Power and Mechatronic Systems, Zhejiang University, Zheda  
Road No. 38, Hangzhou, 310027, China

\*E-mail: xuzhongbin@zju.edu.cn; chen\_dong@zju.edu.cn; weitz@seas.harvard.edu

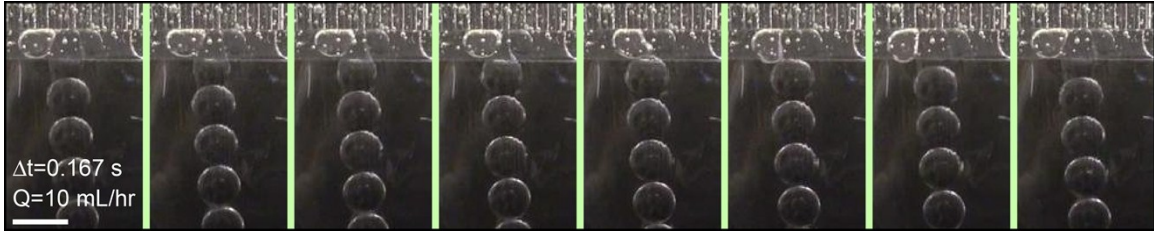

**Figure S1** Process of step-emulsification by a single channel. An air bubble stuck at the left move synchronously back and forth as the droplet grows and breaks. The scale bar is 3 mm.

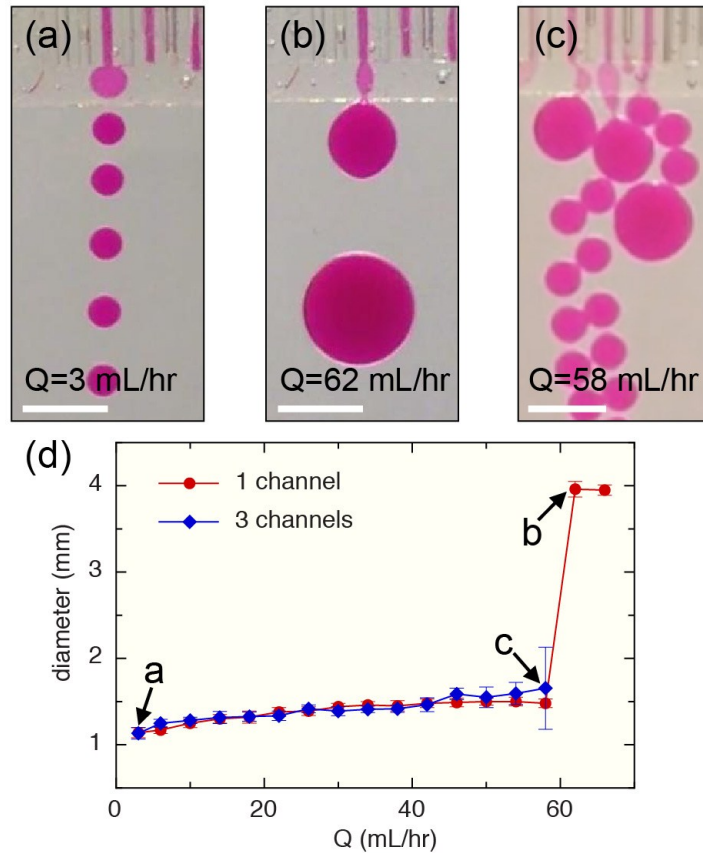

**Figure S2** (a) Generation of monodisperse small droplets at low flow rate,  $Q = 3$  mL/hr, in the dripping regime. (b) Generation of monodisperse large droplets at large flow rate,  $Q = 62$  mL/hr, in the continuous outflow regime. (c) Mixture of small and large droplets generated by three channels at  $Q = 58$  mL/hr. (d) The dependence of droplet size generated by one channel (red curve) and three channel (blue curve) on the flow rate of

the dispersed phase. The scale bars are 3 mm in (a), (b) and (c).

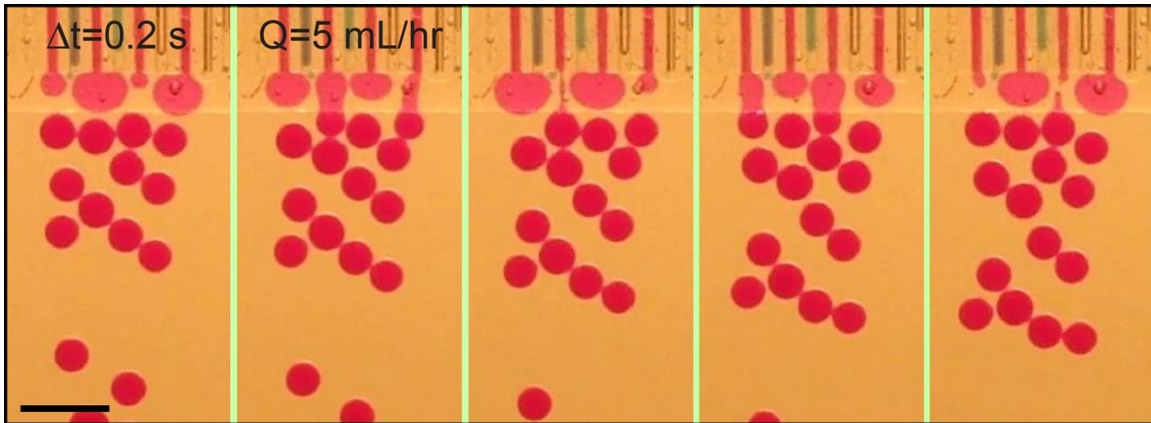

**Figure S3** Time sequences showing four channels runs simultaneously. Neighboring channels are roughly 180 degree out of phase and alternative channels are in phase. The scale bar is 3 mm.

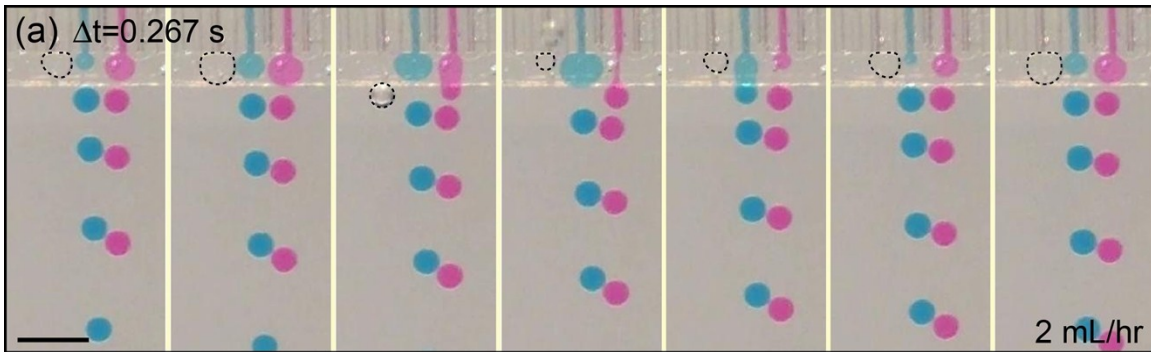

**Figure S4** Time sequences showing three synchronized channel while the left channel is air bubble. The edge of air bubble is outlined by black dashed line for clarity.
